# Supplementary material for: Optimizing Spirulina’s Nutritional Value: The Transformative Role of Iron Biofortification
Source: Research Square preprint supplement (doi:10.21203/rs.3.rs-7606617/v1), 2025-10-01
Supplement: Supplementary file 1 [file 2fe76491500b196824f66c2e.docx]

### Supplementary Material for

**Optimizing *Spirulina’*s Nutritional Value: The Transformative Role of Iron Biofortification**

Fatemeh Gholizadeha, Fatemeh Zarinkamar a*

aDepartment of Plant Biology, Faculty of Biological Sciences, Tarbiat Modares University, Tehran, Iran

*Corresponding author: Fatemeh Zarinkamar, PhD, Email: [zarinkamar@modares.ac.ir](mailto:zarinkamar@modares.ac.ir)

**Figure S1** the growth curve of *Arthrospira platensis* in the modified Zarrouk’s medium supplemented with varying iron concentrations

**
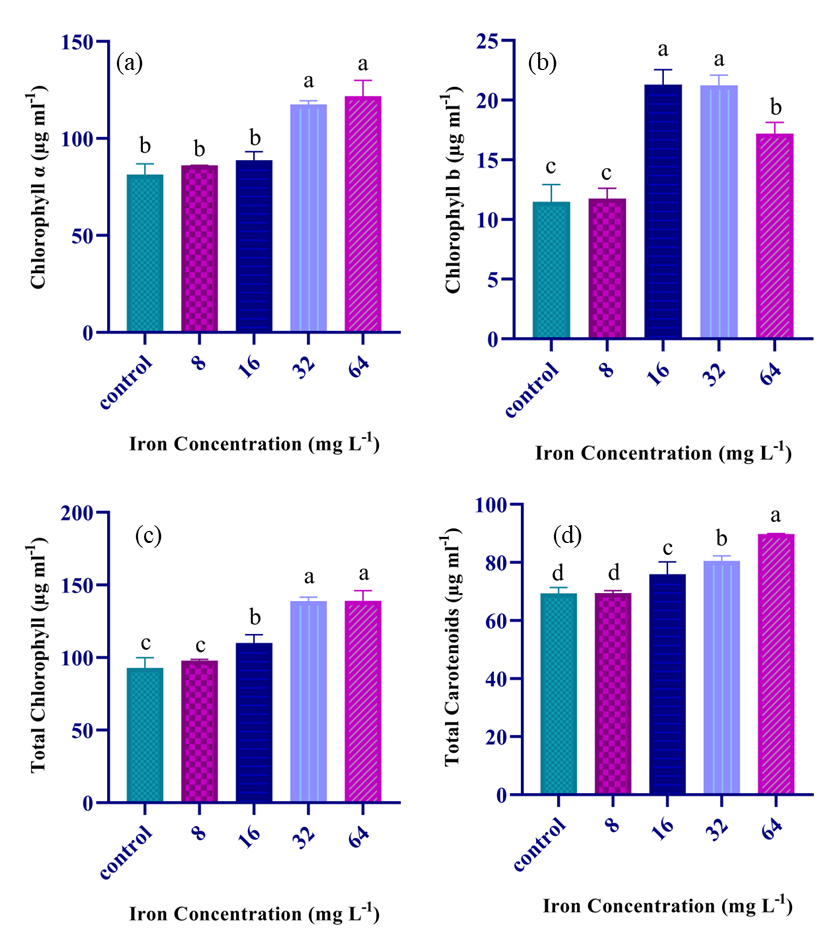
**

**Figure S2** Effect of varying iron concentrations in the culture media on the *chl a* (a), *chl b* (b), total chl (c) and total carotenoids (d) of *A. platensis*
